# Supplementary material for: Red Blood Cell-Derived Inflammatory Markers and Frailty Risk: Evidence from Two Observational Studies
Source: Research Square preprint supplement (doi:10.21203/rs.3.rs-6842822/v1), 2025-07-14
Supplement: Supplementary file 1 [file 1ba75667ccc6002594c83498.docx]

**Supplementary Table 1 Baseline characteristics of sample by frailty and non-frailty groups in the cohort study**

| **Variables** | **Total (n = 107)** | **Non-Frailty (n = 50)** | **Frailty (n = 57)** | ***P*** |
| --- | --- | --- | --- | --- |
|
| Age (years) | 69.00 (66.00, 76.00) | 68.00 (65.00, 73.75) | 70.00 (67.00, 76.00) | 0.040 |
| Sex, n (%) |  |  |  | 0.009 |
| Female | 42 (39.25) | 13 (26.00) | 29 (50.88) |  |
| Male | 65 (60.75) | 37 (74.00) | 28 (49.12) |  |
| Marital status, n (%) |  |  |  | 0.465 |
| Married | 89 (83.18) | 43 (86.00) | 46 (80.70) |  |
| Widowed | 18 (16.82) | 7 (14.00) | 11 (19.30) |  |
| Education level, n (%) |  |  |  | 0.247 |
| Low | 58 (54.21) | 23 (46.00) | 35 (61.40) |  |
| Moderate | 33 (30.84) | 19 (38.00) | 14 (24.56) |  |
| High | 16 (14.95) | 8 (16.00) | 8 (14.04) |  |
| Smoking status, n (%) |  |  |  | 0.006 |
| Regular | 23 (21.50) | 13 (26.00) | 10 (17.54) |  |
| Occasional | 1 (0.93) | 0 (0.00) | 1 (1.75) |  |
| Never | 57 (53.27) | 19 (38.00) | 38 (66.67) |  |
| Former | 26 (24.30) | 18 (36.00) | 8 (14.04) |  |
| Alcohol consumption, n (%) |  |  |  | 0.125 |
| No | 84 (78.50) | 36 (72.00) | 48 (84.21) |  |
| Yes | 23 (21.50) | 14 (28.00) | 9 (15.79) |  |
| Coronary heart disease, n (%) |  |  |  | 0.583 |
| No | 96 (89.72) | 44 (88.00) | 52 (91.23) |  |
| Yes | 11 (10.28) | 6 (12.00) | 5 (8.77) |  |
| Hypertension, n (%) |  |  |  | 0.444 |
| No | 60 (56.07) | 30 (60.00) | 30 (52.63) |  |
| Yes | 47 (43.93) | 20 (40.00) | 27 (47.37) |  |
| Diabetes, n (%) |  |  |  | 1.000 |
| No | 97 (90.65) | 45 (90.00) | 52 (91.23) |  |
| Yes | 10 (9.35) | 5 (10.00) | 5 (8.77) |  |
| BMI (kg/m²), n (%) |  |  |  | 0.099 |
| < 25 | 73 (68.22) | 32 (64.00) | 41 (71.93) |  |
| 25-30 | 31 (28.97) | 18 (36.00) | 13 (22.81) |  |
| ≥ 30 | 3 (2.80) | 0 (0.00) | 3 (5.26) |  |
| Hemoglobin, g/L | 129.72 ± 19.27 | 137.26 ± 18.54 | 123.11 ± 17.52 | <0.001 |
| Albumin, g/L | 40.66 ± 4.03 | 41.64 ± 4.24 | 39.79 ± 3.67 | 0.017 |
| RDW, % | 12.80 (12.30, 13.90) | 12.75 (12.30, 13.78) | 12.90 (12.40, 14.30) | 0.163 |
| HRR | 10.16 (8.52, 11.44) | 11.14 (9.33, 12.11) | 9.78 (8.26, 10.73) | <0.001 |
| RAR | 3.20 (2.96, 3.53) | 3.11 (2.81, 3.34) | 3.31 (3.01, 3.74) | 0.007 |

Continuous variables were expressed as mean (standard error) or median (interquartile range), and categorical variables were expressed as frequencies (percentages); BMI, body mass index; RDW, Red cell distribution width; HRR, the hemoglobin-to-red cell distribution width ratio; RAR, the red blood cell distribution width to albumin ratio

**Supplementary Table 2 Weighted univariate analysis of RDW, HRR, RAR, and covariate associated with frailty in the NHANES**

| **Variables** | **OR (95% CI)** | ***P*** |
| --- | --- | --- |
| Race |  |  |
| Mexican American | 1.00 (Reference) |  |
| Non-Hispanic Black | 0.83 (0.64–1.08) | 0.175 |
| Non-Hispanic White | 0.68 (0.56–0.83) | <0.001 |
| Other Hispanic | 1.03 (0.84–1.27) | 0.782 |
| Other Races | 0.84 (0.62–1.12) | 0.232 |
| Education level |  |  |
| below high school | 1.00 (Reference) |  |
| high school or GED | 0.59 (0.53–0.67) | <0.001 |
| above high school | 0.37 (0.33–0.43) | <0.001 |
| Marital status |  |  |
| Married/Living with Partner | 1.00 (Reference) |  |
| Never married | 1.43 (1.07–1.91) | 0.017 |
| Widowed/Divorced/Separated | 1.85 (1.66–2.06) | <0.001 |
| Sex |  |  |
| Male | 1.00 (Reference) |  |
| Female | 1.38 (1.24–1.53) | <0.001 |
| Alcohol consumption |  |  |
| Yes | 1.00 (Reference) |  |
| No | 1.42 (1.27–1.60) | <0.001 |
| PIR |  |  |
| low | 1.00 (Reference) |  |
| moderate | 0.53 (0.47–0.60) | <0.001 |
| high | 0.24 (0.21–0.27) | <0.001 |
| Coronary heart disease |  |  |
| Yes | 1.00 (Reference) |  |
| No | 0.20 (0.17–0.24) | <0.001 |
| Smoking status |  |  |
| Never | 1.00 (Reference) |  |
| Former | 1.32 (1.17–1.47) | <0.001 |
| Current | 1.55 (1.28–1.88) | <0.001 |
| Hypertension |  |  |
| No | 1.00 (Reference) |  |
| Yes | 3.34 (2.94–3.80) | <0.001 |
| Diabetes |  |  |
| No | 1.00 (Reference) |  |
| Yes | 3.58 (3.15–4.07) | <0.001 |
| BMI, kg/m² |  |  |
| < 25 | 1.00 (Reference) |  |
| 25-30 | 1.21 (1.06–1.39) | 0.005 |
| ≥ 30 | 2.06 (1.76–2.41) | <0.001 |
| HRR | 0.59 (0.56–0.61) | <0.001 |
| RAR | 5.29 (4.50–6.21) | <0.001 |
| RDW, % | 1.65 (1.55–1.76) | <0.001 |

GED, General Educational Development; PIR, poverty income ratio; BMI, body mass index; RDW, Red cell distribution width; HRR, the hemoglobin-to-red cell distribution width ratio; RAR, the red blood cell distribution width to albumin ratio

**Supplementary** **Table 3 Univariate analysis of RDW, HRR, RAR, and covariate associated with frailty in the cohort study**

| **Variables** | **OR (95% CI)** | ***P*** |
| --- | --- | --- |
| Age, years | 1.07 (1.01–1.14) | 0.041 |
| Sex |  |  |
| Female | 1.00 (Reference) |  |
| Male | 0.34 (0.15–0.77) | 0.010 |
| Marital status |  |  |
| Married | 1.00 (Reference) |  |
| Widowed | 1.47 (0.52–4.13) | 0.466 |
| Education level |  |  |
| Low | 1.00 (Reference) |  |
| Moderate | 0.48 (0.20–1.15) | 0.101 |
| High | 0.66 (0.22–2.00) | 0.459 |
| Smoking status |  |  |
| Regular | 1.00 (Reference) |  |
| Occasional | NA | NA |
| Never | 2.60 (0.96–7.01) | 0.059 |
| Former | 0.58 (0.18–1.87) | 0.359 |
| Alcohol consumption |  |  |
| No | 1.00 (Reference) |  |
| Yes | 0.48 (0.19–1.24) | 0.129 |
| Hypertension |  |  |
| No | 1.00 (Reference) |  |
| Yes | 1.35 (0.63–2.91) | 0.444 |
| Coronary heart disease |  |  |
| No | 1.00 (Reference) |  |
| Yes | 0.71 (0.20–2.47) | 0.585 |
| Diabetes |  |  |
| No | 1.00 (Reference) |  |
| Yes | 0.87 (0.24–3.18) | 0.828 |
| BMI, kg/m² |  |  |
| < 25 | 1.00 (Reference) |  |
| 25-30 | 0.56 (0.24–1.32) | 0.186 |
| ≥ 30 | NA | NA |
| Albumin, g/L | 0.88 (0.80–0.98) | 0.020 |
| Hemoglobin, g/L | 0.96 (0.93–0.98) | <0.001 |
| RDW, % | 1.29 (0.99–1.68) | 0.063 |
| HRR | 0.70 (0.56–0.86) | <0.001 |
| RAR | 2.34 (1.14–4.78) | 0.020 |

BMI, body mass index; RDW, Red cell distribution width; HRR, the hemoglobin-to-red cell distribution width ratio; RAR, the red blood cell distribution width to albumin ratio; NA: Odds ratio and confidence interval could not be calculated due to the small number of cases.

**Supplementary Table 4 Piecewise regression threshold analysis of the association between HRR and frailty in the NHANES**

| **Outcome** | **OR (95% CI)** | ***P*** |
| --- | --- | --- |
|
| Model 1 Fitting model by standard linear regression | 0.64 (0.61–0.66) | <0.001 |
| Model 2 Fitting model by two-piecewise linear regression |  |  |
| Inflection point | 11.475 |  |
| < 11.475 | 0.60 (0.58–0.63) | <0.001 |
| ≥ 11.475 | 0.86 (0.73–1.02) | 0.091 |
| *P* for likelihood test |  | 0.002 |

Adjusted for: sex, age, race, education level, marital status, PIR, BMI, smoking status, alcohol consumption, coronary heart disease, hypertension and diabetes.
